# Supplementary material for: Red Orange and Lemon Extract Ameliorates the Renal Oxidative Stress and Inflammation Induced by Ochratoxin A through the Modulation of Nrf2
Source: MDPI journal article supplement (doi:10.3390/toxins16030151), 2024-03-14
Supplement: s1 [file s1]

# Red Orange and Lemon Extract Ameliorates the Renal Oxidative Stress and Inflammation Induced by Ochratoxin A through the Modulation of Nrf2

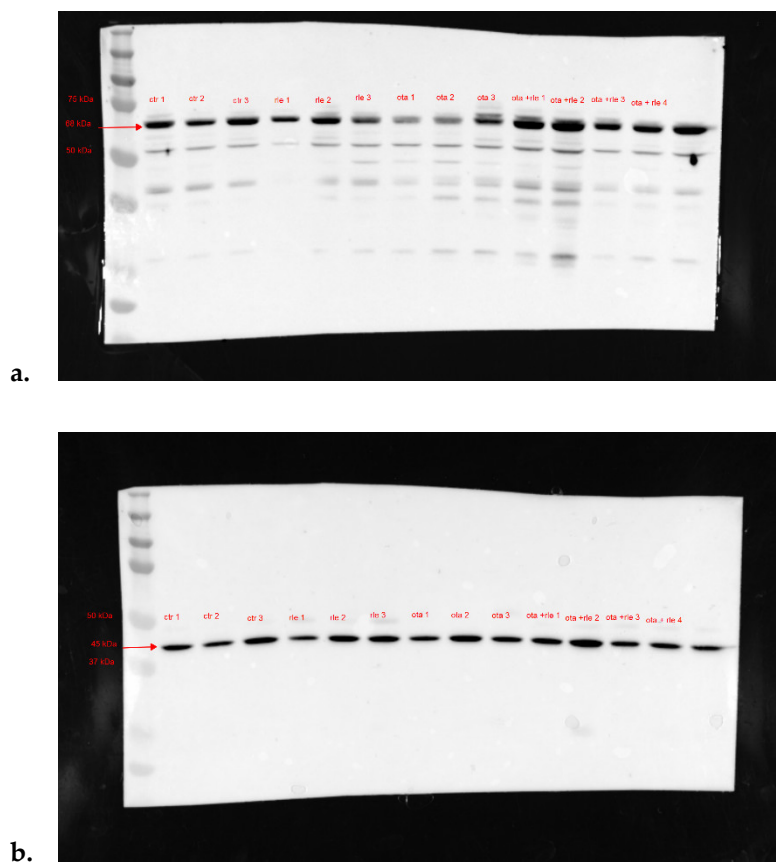

**Figure S1.** (a) Whole blot of Nrf2 protein expression; (b) whole blot of  $\beta$ -actin protein expression.
